# Supplementary material for: Safe-and-sustainable-by-design chemicals and advanced materials: a paradigm shift towards prevention-based risk governance is needed
Source: Royal Society of Chemistry journal article supplement (doi:10.1039/d3su00045a), 2023-01-01
Supplement: d3su00045a1.pdf [file d3su00045a1.pdf]

# Supplementary material

## Exercise participants

Participants in the Nanosafety School training session featured in this manuscript came from different sectors (academia, industry, regulation). In Table 1 the distribution of participants among these sectors and their level of experience are reported.

For the purposes of the conducted exercise each participant was assigned to a specific stakeholder category among manufacturers, consumers and regulators. All participants from industry were assigned to manufacturers as well as all regulators were assigned to the regulators category. Participants from academia were mostly assigned to consumers even though some were appointed as industry or regulators to better simulate real life conditions.

*Table 1: Distribution of participants among sectors and their experience level*

| Sector     | Participants | Early career | Experienced |
|------------|--------------|--------------|-------------|
| Academia   | 48           | 33           | 15          |
| Industry   | 11           | 6            | 5           |
| Regulation | 13           | 3            | 10          |

## Criteria and scores

The illustrative case study proposed for the exercise during the Nanosafety Training School presented three alternatives, namely: Baseline, Low-end and High-end. The assessment criteria which were considered are reported in Table 1 alongside their scores for each of the proposed alternatives. Scores reported in the table were created so to emphasise the expected differences among the three alternatives in order to make the exercise as illustrative as possible.

Categories' scores were obtained by aggregating criteria through simple average. Results were rounded to integer numbers to reflect the initial scoring scale [1-5] as reported in Table 1 of the main text.

*Table 2: Criteria organization and scores used for the application of the MAVT assessment.*

| Category       | Criteria                             | Baseline | Low-end | High-end |
|----------------|--------------------------------------|----------|---------|----------|
| EHS            | Degradability                        | 5        | 4       | 1        |
| EHS            | AOP                                  | 5        | 3       | 2        |
| EHS            | CPM's                                | 5        | 4       | 5        |
| EHS            | Persistence                          | 4        | 5       | 2        |
| EHS            | Hazard, Exposure, Risk               | 3        | 3       | 2        |
| EHS            | PC characteristics                   | 5        | 5       | 2        |
| EHS            | Types of processes and activities    | 5        | 3       | 4        |
| EHS            | Binding affinity                     | 5        | 2       | 1        |
| EHS            | Reactivity                           | 5        | 4       | 3        |
| EHS            | Dissolution                          | 5        | 2       | 2        |
| Sustainability | Release                              | 5        | 2       | 2        |
| Sustainability | Bioaccumulation and biomagnification | 5        | 4       | 1        |

|                |                                  |   |   |   |
|----------------|----------------------------------|---|---|---|
| Sustainability | Toxicity                         | 5 | 2 | 1 |
| Sustainability | Recyclability                    | 5 | 2 | 2 |
| Sustainability | education                        | 5 | 1 | 1 |
| Sustainability | Public opinion                   | 5 | 1 | 2 |
| Sustainability | Recycling                        | 5 | 1 | 1 |
| Sustainability | Job opportunities                | 4 | 4 | 2 |
| Sustainability | Child labour                     | 5 | 2 | 2 |
| Sustainability | Fair salaries                    | 3 | 3 | 1 |
| Sustainability | Affordable Purchase costs        | 4 | 5 | 3 |
| Sustainability | Circular economy                 | 5 | 2 | 1 |
| Sustainability | Healthcare costs                 | 4 | 4 | 1 |
| Sustainability | Profits                          | 4 | 2 | 1 |
| Sustainability | Advantage of reuse, recycle cost | 5 | 5 | 1 |
| Functionality  | Responsiveness                   | 1 | 1 | 5 |
| Functionality  | Reactivity                       | 1 | 1 | 5 |
| Functionality  | Strength                         | 2 | 4 | 4 |
| Functionality  | Luminescence                     | 1 | 2 | 4 |
| Functionality  | Charge                           | 2 | 3 | 5 |
| Functionality  | Solubility                       | 1 | 5 | 5 |

21 The participants were asked to propose new criteria missing in the proposed list according to their  
22 experience. Such criteria are considered for future applications of the methodology and are reported in  
23 Table 2 below.

24 *Table 3: Criteria proposed by the participants of the Nanosafety Training School session.*

| Category    | Criteria                                               |
|-------------|--------------------------------------------------------|
| Environment | Genotoxicity                                           |
| Environment | Interaction with other substances                      |
| Environment | Accumulation                                           |
| Social      | Long term aspects taking into account next generations |
| Social      | Increased performance and safety                       |
| Social      | Risk benefit ratio                                     |
| Social      | Gender issues                                          |
| Social      | Well-being                                             |
| Economic    | Resources, materials and energies costs                |
| Economic    | Taxes                                                  |
| Economic    | Market leadership                                      |
| Economic    | Regulatory issues                                      |

## 25 Stakeholders' weights profiles

26 The participants were asked to propose their weight profiles for the assessed categories: EHS,  
27 Sustainability and Functionality.

28 Each participant was assigned to a specific typology among manufacturers, consumers and regulators.  
 29 The collected weights are reported in Table 2 where for each proposed weight in [1-5] the  
 30 corresponding number of votes are reported.

31 Aggregated weights were calculated by weighted average of weights by the numbers of votes and were  
 32 rounded to integer numbers to reflect the initial weighting scale [1-5] as reported in Table 1 of the main  
 33 text.

34 *Table 4: Stakeholders' weights profiles by stakeholder categories*

| Stakeholder   | Category       | Weight | Votes |
|---------------|----------------|--------|-------|
| Manufacturers | EHS            | 1      | 3     |
| Manufacturers | EHS            | 2      | 8     |
| Manufacturers | EHS            | 3      | 2     |
| Manufacturers | EHS            | 4      | 0     |
| Manufacturers | EHS            | 5      | 0     |
| Manufacturers | Sustainability | 1      | 9     |
| Manufacturers | Sustainability | 2      | 2     |
| Manufacturers | Sustainability | 3      | 2     |
| Manufacturers | Sustainability | 4      | 0     |
| Manufacturers | Sustainability | 5      | 0     |
| Manufacturers | Functionality  | 1      | 0     |
| Manufacturers | Functionality  | 2      | 0     |
| Manufacturers | Functionality  | 3      | 1     |
| Manufacturers | Functionality  | 4      | 3     |
| Manufacturers | Functionality  | 5      | 9     |
| Consumers     | EHS            | 1      | 0     |
| Consumers     | EHS            | 2      | 5     |
| Consumers     | EHS            | 3      | 7     |
| Consumers     | EHS            | 4      | 13    |
| Consumers     | EHS            | 5      | 7     |
| Consumers     | Sustainability | 1      | 1     |
| Consumers     | Sustainability | 2      | 2     |
| Consumers     | Sustainability | 3      | 5     |
| Consumers     | Sustainability | 4      | 11    |
| Consumers     | Sustainability | 5      | 13    |
| Consumers     | Functionality  | 1      | 0     |
| Consumers     | Functionality  | 2      | 5     |
| Consumers     | Functionality  | 3      | 5     |
| Consumers     | Functionality  | 4      | 13    |
| Consumers     | Functionality  | 5      | 9     |
| Regulators    | EHS            | 1      | 0     |
| Regulators    | EHS            | 2      | 0     |
| Regulators    | EHS            | 3      | 2     |
| Regulators    | EHS            | 4      | 9     |

|            |                |   |    |
|------------|----------------|---|----|
| Regulators | EHS            | 5 | 16 |
| Regulators | Sustainability | 1 | 0  |
| Regulators | Sustainability | 2 | 0  |
| Regulators | Sustainability | 3 | 2  |
| Regulators | Sustainability | 4 | 4  |
| Regulators | Sustainability | 5 | 21 |
| Regulators | Functionality  | 1 | 6  |
| Regulators | Functionality  | 2 | 15 |
| Regulators | Functionality  | 3 | 4  |
| Regulators | Functionality  | 4 | 2  |
| Regulators | Functionality  | 5 | 0  |
